# Supplementary material for: Transient Elastography for Significant Liver Fibrosis and Cirrhosis in Chronic Hepatitis B: A Meta-Analysis
Source: Hindawi journal article supplement (doi:10.1155/2018/3406789), 2018-01-01
Supplement: f1 [file 3406789.f1.zip]

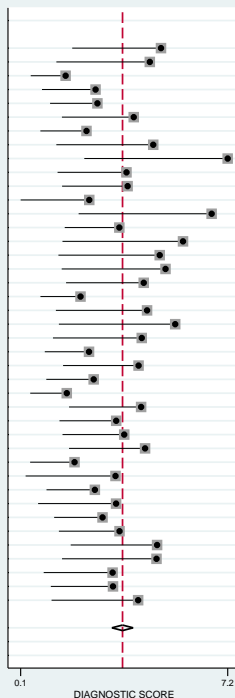

| StudyId                                | DIAGNOSTIC SCORE (95% CI) |
|----------------------------------------|---------------------------|
| Zhu et al./2011                        | 4.93 [1.87 - 4.93]        |
| Zhang X et al./2011                    | 4.54 [1.32 - 4.54]        |
| Zhang DK et al./2016                   | 1.64 [0.43 - 1.64]        |
| Wong et al.Va-c/2014                   | 2.67 [0.82 - 2.67]        |
| Wong et al.Tr-c/2014                   | 2.73 [1.10 - 2.73]        |
| Wong et al./2009                       | 3.99 [1.51 - 3.99]        |
| Wang HX et al./2016                    | 2.36 [0.77 - 2.36]        |
| Wang CY et al./2014                    | 4.66 [1.32 - 4.66]        |
| Wang CY et al./2015                    | 7.23 [2.28 - 7.23]        |
| Vigano et al./2011                     | 3.74 [1.36 - 3.74]        |
| Trembling et al./2013                  | 3.78 [1.52 - 3.78]        |
| Stibbe et al./2011                     | 2.45 [0.09 - 2.45]        |
| Sporea et al./2010                     | 6.67 [2.09 - 6.67]        |
| Seo et al./2015                        | 3.49 [1.61 - 3.49]        |
| Qin et al./2015                        | 5.69 [1.53 - 5.69]        |
| Osakabe et al./2011                    | 4.88 [1.39 - 4.88]        |
| Miallhes et al./2011                   | 5.08 [1.50 - 5.08]        |
| Meng YL et al./2016                    | 4.33 [1.65 - 4.33]        |
| Meng F et al./2015                     | 2.15 [0.77 - 2.15]        |
| Marcellin et al./2009                  | 4.45 [1.30 - 4.45]        |
| Liu ZQ et al./2012                     | 5.42 [1.41 - 5.42]        |
| Liu DY et al./2015                     | 4.26 [1.20 - 4.26]        |
| Kim SU et al.3/2012                    | 2.45 [0.92 - 2.45]        |
| Kim SU et al.2/2009                    | 4.15 [1.55 - 4.15]        |
| Kim SU et al.1/2009                    | 2.61 [0.97 - 2.61]        |
| Kim DY et al. /2009                    | 1.68 [0.42 - 1.68]        |
| Kim BK et al.2/2012                    | 4.24 [1.76 - 4.24]        |
| Kim BK et al.1/2012                    | 3.38 [1.43 - 3.38]        |
| Jia et al./2015                        | 3.66 [1.53 - 3.66]        |
| Goyal et al./2013                      | 4.38 [1.76 - 4.38]        |
| Gaia S et al./2011                     | 1.95 [0.41 - 1.95]        |
| Dong et al/2015                        | 3.36 [0.26 - 3.36]        |
| Degos F et al./2010                    | 2.65 [0.98 - 2.65]        |
| Cho et al./2011                        | 3.38 [0.69 - 3.38]        |
| Cheng JY et al./2015                   | 2.91 [1.24 - 2.91]        |
| Chen YP et al./2012                    | 3.50 [1.41 - 3.50]        |
| Chen XB et al./2011                    | 4.79 [1.81 - 4.79]        |
| Chan et al./2009                       | 4.77 [1.51 - 4.77]        |
| Cast'ira L et al./2010                 | 3.26 [0.88 - 3.26]        |
| Cardoso et al./2011                    | 3.27 [1.13 - 3.27]        |
| Cao et al./2014                        | 4.14 [1.15 - 4.14]        |
| COMBINED                               | 3.60 [3.23 - 3.97]        |
| Q = 119.53, df = 40.00, p = 0.00       |                           |
| I <sup>2</sup> = 66.54 [55.61 - 77.46] |                           |

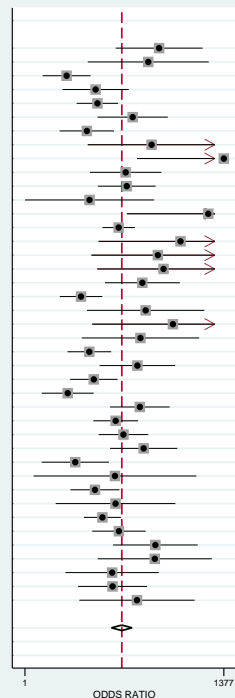

| StudyId                                   | ODDS RATIO (95% CI)       |
|-------------------------------------------|---------------------------|
| Zhu et al./2011                           | 138.12 [29.46 - 647.56]   |
| Zhang X et al./2011                       | 93.89 [10.94 - 806.09]    |
| Zhang DK et al./2016                      | 5.15 [2.20 - 12.06]       |
| Wong et al.Va-c/2014                      | 14.45 [4.45 - 46.97]      |
| Wong et al.Tr-c/2014                      | 15.40 [7.37 - 32.18]      |
| Wong et al./2009                          | 53.90 [15.47 - 187.82]    |
| Wang HX et al./2016                       | 10.57 [4.02 - 27.80]      |
| Wang CY et al./2014                       | 105.60 [10.92 - 1000.00]  |
| Wang CY et al./2015                       | 1377.00 [62.80 - 1000.00] |
| Vigano et al./2011                        | 42.00 [11.80 - 149.52]    |
| Trembling et al./2013                     | 43.67 [15.64 - 121.89]    |
| Stibbe et al./2011                        | 11.64 [1.17 - 115.59]     |
| Sporea et al./2010                        | 792.00 [44.02 - 1000.00]  |
| Seo et al./2015                           | 32.80 [18.45 - 58.32]     |
| Qin et al./2015                           | 295.11 [16.04 - 1000.00]  |
| Osakabe et al./2011                       | 132.00 [12.44 - 1000.00]  |
| Miallhes et al./2011                      | 161.33 [15.27 - 1000.00]  |
| Meng YL et al./2016                       | 76.08 [20.09 - 288.07]    |
| Meng F et al./2015                        | 8.60 [4.04 - 18.31]       |
| Marcellin et al./2009                     | 85.43 [10.62 - 687.32]    |
| Liu ZQ et al./2012                        | 225.55 [12.80 - 1000.00]  |
| Liu DY et al./2015                        | 71.11 [8.85 - 571.48]     |
| Kim SU et al.3/2012                       | 11.54 [5.30 - 25.10]      |
| Kim SU et al.2/2009                       | 63.75 [16.64 - 244.23]    |
| Kim SU et al.1/2009                       | 13.55 [5.83 - 31.48]      |
| Kim DY et al. /2009                       | 5.36 [2.13 - 13.47]       |
| Kim BK et al.2/2012                       | 69.58 [24.17 - 200.24]    |
| Kim BK et al.1/2012                       | 29.46 [13.30 - 65.26]     |
| Jia et al./2015                           | 38.82 [16.06 - 93.84]     |
| Goyal et al./2013                         | 79.75 [24.18 - 263.05]    |
| Gaia S et al./2011                        | 7.00 [2.12 - 23.15]       |
| Dong et al/2015                           | 28.75 [1.60 - 517.68]     |
| Degos F et al./2010                       | 14.11 [5.90 - 33.73]      |
| Cho et al./2011                           | 29.33 [3.50 - 246.17]     |
| Cheng JY et al./2015                      | 18.39 [9.53 - 35.49]      |
| Chen YP et al./2012                       | 33.04 [12.79 - 85.36]     |
| Chen XB et al./2011                       | 120.75 [26.81 - 543.82]   |
| Chan et al./2009                          | 118.30 [15.58 - 898.38]   |
| Cast'ira L et al./2010                    | 26.00 [4.95 - 136.50]     |
| Cardoso et al./2011                       | 26.37 [7.73 - 89.95]      |
| Cao et al./2014                           | 62.76 [8.09 - 486.64]     |
| COMBINED                                  | 36.63 [25.38 - 52.87]     |
| Q = 1.2e+08, df = 40.00, p = 0.00         |                           |
| I <sup>2</sup> = 100.00 [100.00 - 100.00] |                           |
