# Supplementary figures and images for: Transient Elastography for Significant Liver Fibrosis and Cirrhosis in Chronic Hepatitis B: A Meta-Analysis
Source: Hindawi journal article supplement (doi:10.1155/2018/3406789), 2018-01-01

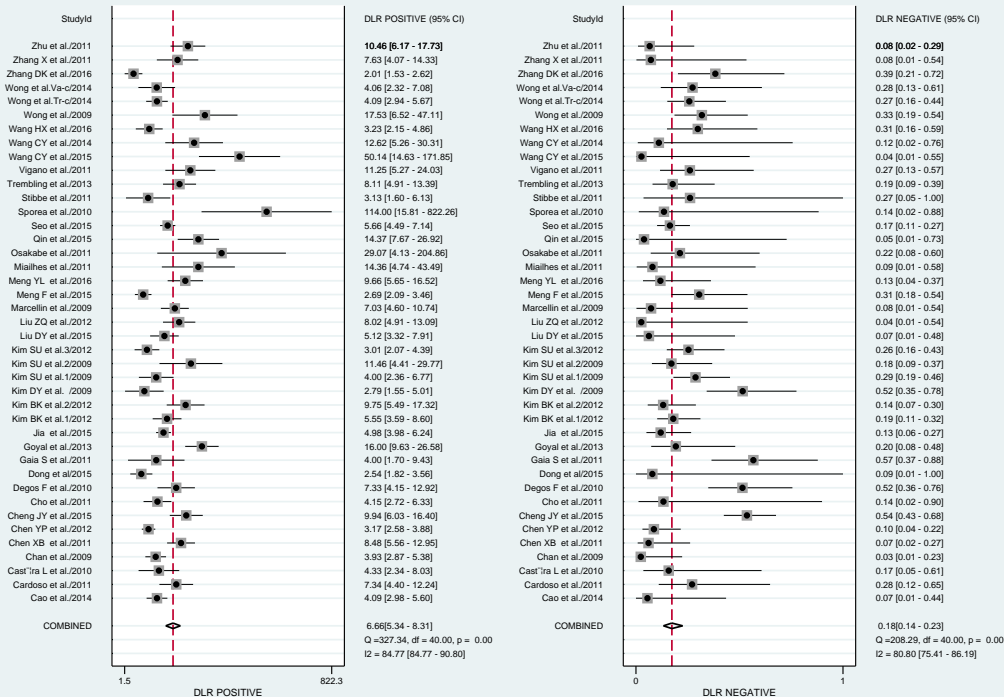

Supplement: f1 [file 3406789.f1.zip]

Deeks' Funnel Plot Asymmetry Test  
pvalue = 0.02

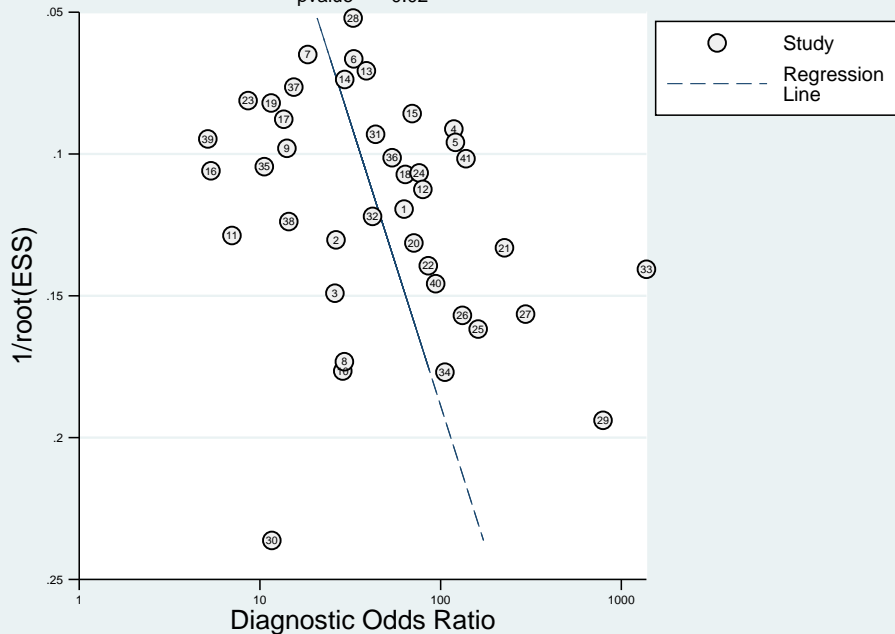

Supplement: f1 [file 3406789.f1.zip]

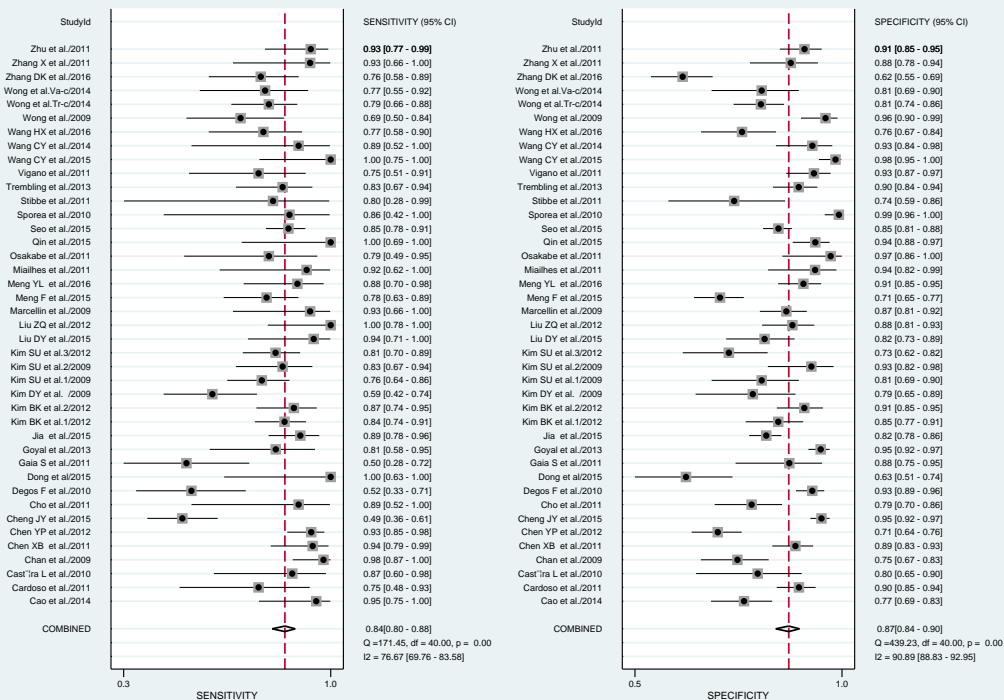

Supplement: f1 [file 3406789.f1.zip]

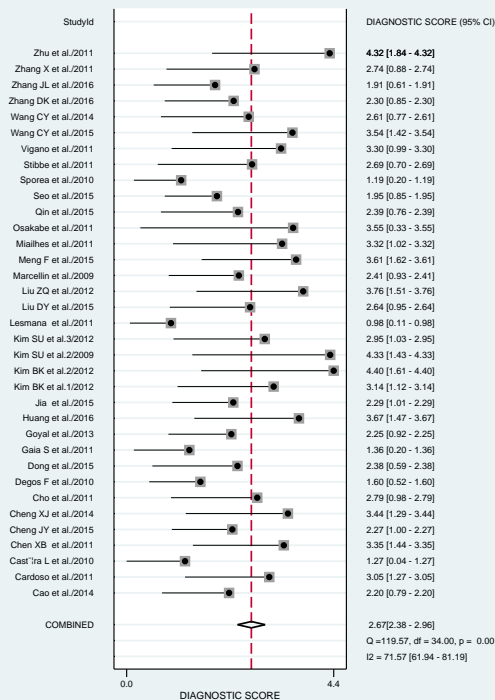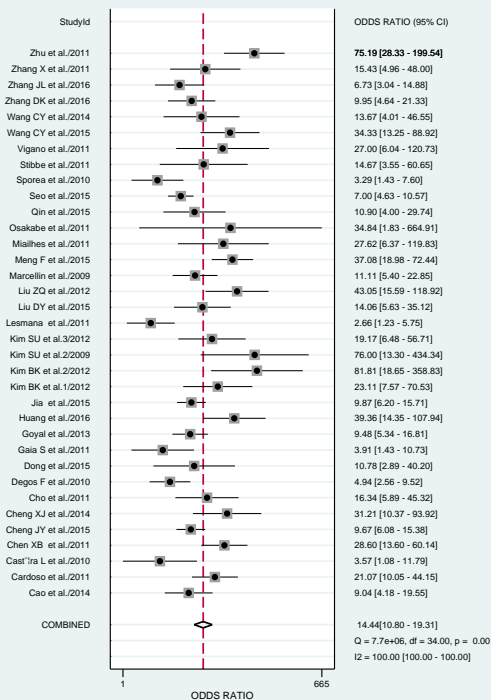

Supplement: f1 [file 3406789.f1.zip]

Deeks' Funnel Plot Asymmetry Test  
pvalue = 0.26

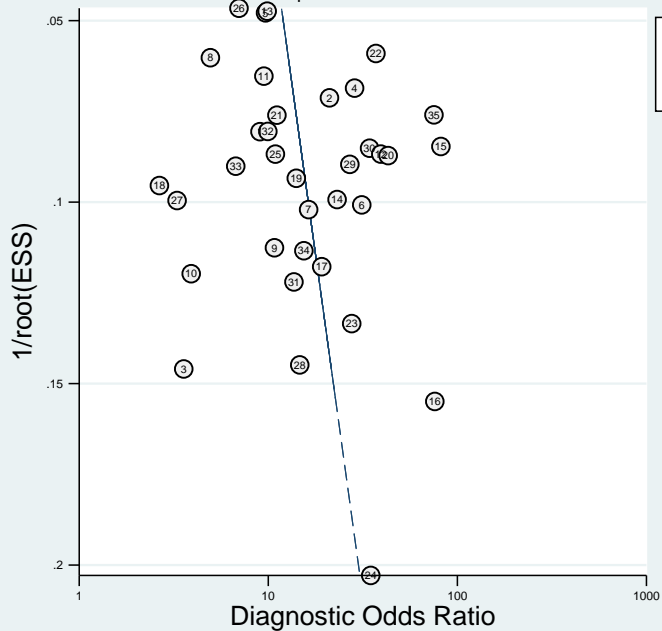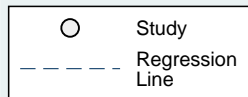

Supplement: f1 [file 3406789.f1.zip]

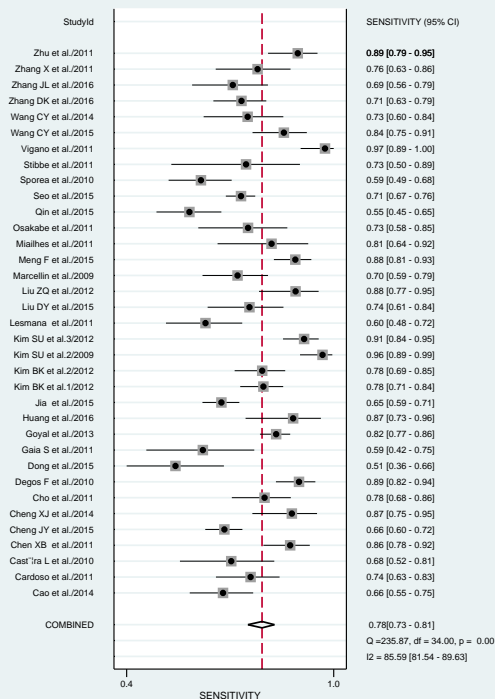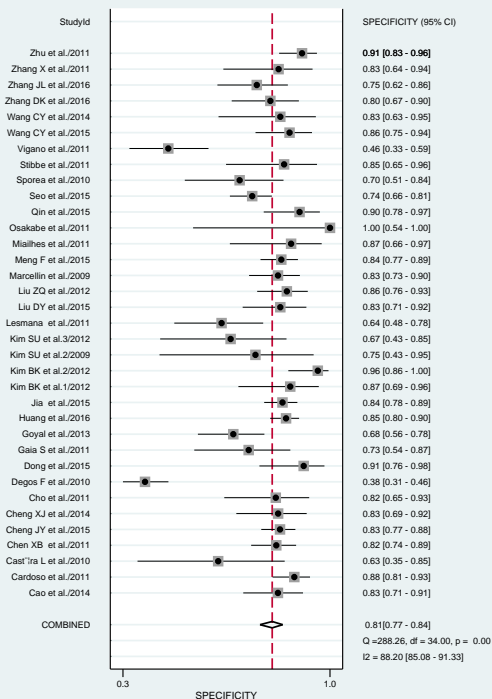

Supplement: f1 [file 3406789.f1.zip]

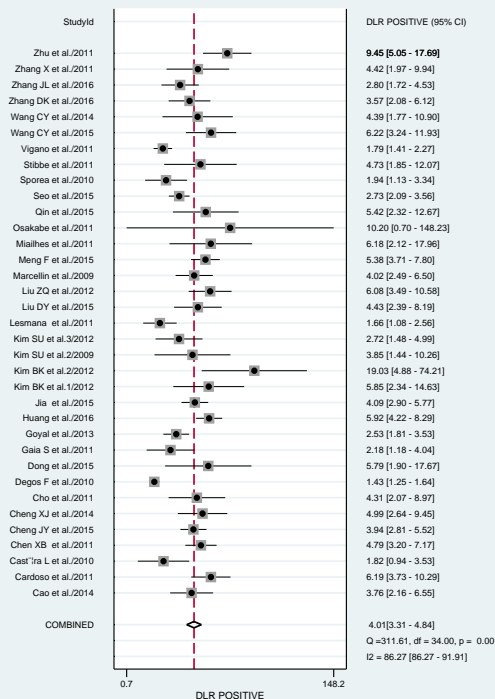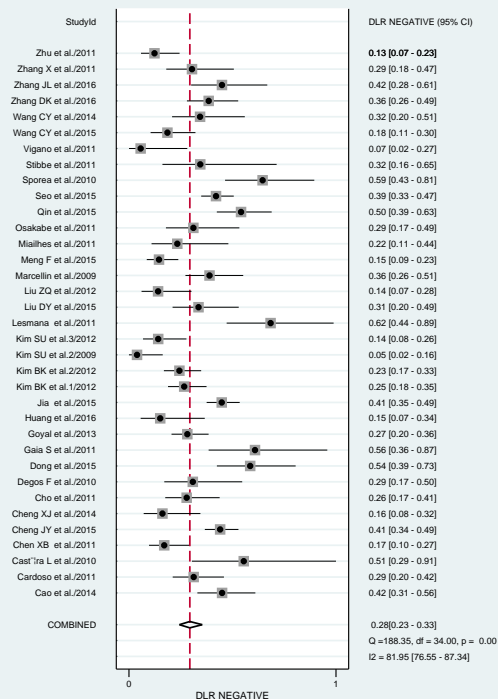

Supplement: f1 [file 3406789.f1.zip]
